# Supplementary material
Source: Springer Nature journal article supplement (https://www.springermedizin.de/resource/supplementary/12936_2008_838_MOESM1_ESM.pdf/9549056)
Supplement: MOESM1 [file 9549056]

From 01/1998 to 12/2008

Pubmed search: **963**

*mdr*

236

*crt*

159

*dhf*

373

*dhp*

195

Abstract-based: **406**

66

68

152

120

Full paper selection:

42

42

61

59

Data extraction: **124**

39

25

33

27

557 excluded (basic science / methods)

202 excluded (*vitro* / no follow-up)

80 excluded (no relation patient-Snps )

32 excluded (no failure /no wild)

*mdr* copy

1

28

25

18

20

3

*dhfr+dhps*
